# Supplementary material for: Microeconomic Costs, Insurance, and Catastrophic Health Spending Among Patients With Acute Myocardial Infarction in India: Substudy of a Randomized Clinical Trial
Source: PubMed Central journal article supplement (PMC6537817; doi:10.1001/jamanetworkopen.2019.3831), 2019-05-17

## Supplementary Online Content

Mohanan PP, Huffman MD, Baldrige AS, et al; ACS QUIK Investigators. Microeconomic costs, insurance, and catastrophic health spending among patients with acute myocardial infarction in India: substudy of a randomized clinical trial. *JAMA Netw Open*. 2019;2(5):e193831. doi:10.1001/jamanetworkopen.2019.3831

**eTable 1.** Demographics, Clinical Presentation, and Laboratory Data From 2,114 ACS QUIK Respondents Who Completed Microeconomic Questionnaires, by Gender With Unadjusted *P* Value for Differences

**eTable 2.** Detailed In-Hospital and Post-Hospitalization Expenditures (INT\$) of 2,114 ACS QUIK Respondents Who Completed Microeconomic Questionnaires, Overall and by Hospital Type

**eTable 3.** Detailed In-Hospital and Post-Hospitalization Expenditures (INT\$) of 2,114 ACS QUIK Respondents Who Completed Microeconomic Questionnaires, Overall and by Myocardial Infarction Type

**eFigure 1.** Flowchart of Participants Completing Microeconomic Survey During Steps Within the ACS QUIK Cluster Randomized Stepped Wedge Trial

**eFigure 2.** Proportion of CVD Expenses Paid From Patient Reported Payment Sources by Insurance Status

This supplementary material has been provided by the authors to give readers additional information about their work.

**eTable 1.** Demographics, Clinical Presentation, and Laboratory Data From 2,114 ACS QUIK Respondents Who Completed Microeconomic Questionnaires, by Gender With Unadjusted *P* Value for Differences

| Characteristic                               | N    | Male<br>n=1521       | Female<br>n=593      | <i>P</i><br>value |
|----------------------------------------------|------|----------------------|----------------------|-------------------|
| <b>Demographics at Hospital Presentation</b> |      |                      |                      |                   |
| Age, mean (SD), years                        | 2114 | 60.3 ± 12.3          | 67.4 ± 12.2          | <.001             |
| No insurance, n (%)                          | 2114 | 1162 (76.4)          | 438 (73.9)           | 0.22              |
| History of tobacco use, n (%)                | 2114 | 591 (38.9)           | 27 (4.6)             | <.001             |
| History of diabetes, n (%)                   | 2114 | 595 (39.1)           | 306 (51.6)           | <.001             |
| Transferred, n (%)                           | 2114 | 671 (44.1)           | 236 (39.8)           | 0.07              |
| ST elevation myocardial infarction, n (%)    | 2114 | 889 (58.4)           | 255 (43.0)           | <.001             |
| Symptom-to-door time, median (IQR), min      | 2015 | 240 (120-893)        | 330 (140-1200)       | <.001             |
| Body weight, mean (SD), kg                   | 2113 | 62.5 ± 10.3          | 55.5 ± 10.1          | <.001             |
| Systolic blood pressure, mean (SD), mmHg     | 2114 | 141.1 ± 30.2         | 148.5 ± 31.1         | <.001             |
| Heart rate, mean (SD), bpm                   | 2114 | 80.1 ± 18.9          | 86.6 ± 20.8          | <.001             |
| Initial troponin, median (IQR), ng/ml        | 492  | 1.80 (0.57-7.32)     | 1.16 (0.33-3.10)     | 0.002             |
| LDL cholesterol, mean (SD), mg/dl            | 1587 | 119.2 ± 40.5         | 125.5 ± 43.9         | 0.006             |
| Triglycerides, median (IQR), mg/dl           | 1593 | 124 (93-176)         | 121 (95-164)         | 0.41              |
| Serum creatinine, median (IQR), mg/dl        | 980  | 1.1 (0.9-1.3)        | 1.0 (0.8-1.2)        | <.001             |
| Fasting glucose, median (IQR), mg/dl         | 1394 | 128 (103-177)        | 135 (107-186)        | 0.10              |
| Hemoglobin, mean (SD), mg/dl                 | 2035 | 13.7 ± 1.9           | 11.8 ± 1.7           | <.001             |
| ACS QUIK Intervention n (%)                  | 2114 | 793 (52.1)           | 292 (49.2)           | 0.23              |
| <b>Socioeconomics</b>                        |      |                      |                      |                   |
| Married, n (%)                               | 2114 | 1396 (91.8)          | 355 (59.9)           | <.001             |
| Rural, n (%)                                 | 2113 | 1129 (74.3)          | 466 (78.6)           | 0.04              |
| Education level, median (IQR), years         | 1941 | 10 (6-12)            | 7 (4-10)             | <.001             |
| Time to survey completion, days (IQR)        | 1899 | 31 (30-34)           | 31 (30-34)           | 0.82              |
| Unemployment, n (%)                          | 2114 | 354 (23.3)           | 470 (79.3)           | <.001             |
| Baseline monthly individual income           |      |                      |                      |                   |
| Median (IQR) Rs                              | 2074 | 10000 (5000-15000)   | 2000 (0-10000)       | <.001             |
| Median (IQR) INT <sup>a</sup>                | 2074 | 583.0 (291.5-874.5)  | 116.6 (0.0-583.0)    |                   |
| Baseline monthly household income            |      |                      |                      |                   |
| Median (IQR) Rs                              | 2112 | 10000 (8000-20000)   | 10000 (7000-18000)   | 0.008             |
| Median (IQR) INT <sup>a</sup>                | 2112 | 583.0 (466.4-1166.0) | 583.0 (408.1-1049.4) |                   |

|                                                      |      |             |            |       |
|------------------------------------------------------|------|-------------|------------|-------|
| Dependents < 18 years old, n (%)                     | 2114 | 950 (62.5)  | 388 (65.4) | 0.20  |
| Dependents > 60 years old, n (%)                     | 2114 | 866 (56.9)  | 442 (74.5) | <.001 |
| Other individuals in household earning income, n (%) | 2114 | 1406 (92.4) | 553 (93.3) | 0.52  |

Abbreviations: LDL=low density lipoprotein, Rs=Indian rupees, INT=international dollar, IQR=interquartile range

**eTable 2.** Detailed In-Hospital and Post-Hospitalization Expenditures (INT\$) of 2,114 ACS QUIK Respondents Who Completed Microeconomic Questionnaires, Overall and by Hospital Type.

IQR=interquartile range, INT=international dollar

| Expenditures                                   | N    | Overall<br>n=2,114    | Government Hospital<br>n=456 | Non-Profit/Charity<br>Hospital<br>n=1135 | Private Hospital<br>n=523 | P-Value |
|------------------------------------------------|------|-----------------------|------------------------------|------------------------------------------|---------------------------|---------|
| <b>Median (IQR) In-Hospital Costs</b>          |      |                       |                              |                                          |                           |         |
| Hospital Admission                             | 1319 | 7.0 (0.0-7.0)         | 0.0 (0.0-0.0)                | 7.0 (7.0-7.0)                            | 8.7 (1.2-87.5)            | <0.001  |
| Tests                                          | 1202 | 58.3 (43.7-174.9)     | 40.8 (7.0-58.3)              | 87.5 (58.3-174.9)                        | 176.7 (87.5-288.3)        | <0.001  |
| Emergency Room                                 | 1299 | 0.0 (0.0-11.7)        | 0.0 (0.0-0.0)                | 0.0 (0.0-11.7)                           | 104.9 (35.0-186.6)        | <0.001  |
| Food                                           | 934  | 58.3 (29.2-58.3)      | 17.5 (14.6-20.4)             | 58.3 (29.2-58.3)                         | 81.6 (58.3-116.6)         | <0.001  |
| Treatment                                      | 1099 | 291.5 (58.3-4809.9)   | 0.0 (0.0-0.0)                | 583.0 (233.2-5830.2)                     | 174.9 (78.7-1457.6)       | <0.001  |
| Ambulance                                      | 1048 | 0.0 (0.0-0.0)         | 0.0 (0.0-5.8)                | 0.0 (0.0-0.0)                            | 0.0 (0.0-17.5)            | <0.001  |
| Surgery                                        | 1182 | 0.0 (0.0-0.0)         | 0.0 (0.0-0.0)                | 0.0 (0.0-0.0)                            | 0.0 (0.0-0.0)             | <0.001  |
| Other                                          | 931  | 0.0 (0.0-29.2)        | 0.0 (0.0-0.0)                | 0.0 (0.0-29.2)                           | 58.3 (11.7-116.6)         | <0.001  |
| Medicine                                       | 1224 | 116.6 (58.3-240.8)    | 116.6 (0.0-174.9)            | 116.6 (58.3-320.7)                       | 240.8 (116.6-355.6)       | <0.001  |
| Attendant                                      | 2114 | 58.3 (26.2-116.6)     | 87.5 (26.2-116.6)            | 87.5 (29.2-116.6)                        | 0.0 (0.0-58.3)            | <0.001  |
| Travel                                         | 2114 | 14.3 (5.8-29.2)       | 45.2 (17.5-58.3)             | 8.7 (0.0-17.5)                           | 14.6 (8.7-23.3)           | <0.001  |
| Total In-Hospital Cost                         | 917  | 1457.6 (583.0-7287.8) | 44.7 (18.5-233.2)            | 5480.4 (874.5-7287.8)                    | 1589.1 (878.3-6704.8)     | <0.001  |
| <b>Median (IQR) Post-Hospitalization Costs</b> |      |                       |                              |                                          |                           |         |
| Doctor Fees                                    | 1297 | 7.0 (0.0-11.7)        | 0.0 (0.0-0.0)                | 7.0 (7.0-8.7)                            | 14.6 (11.7-29.2)          | <0.001  |
| Rehabilitation                                 | 1013 | 0.0 (0.0-0.0)         | 0.0 (0.0-0.0)                | 0.0 (0.0-0.0)                            | 0.0 (0.0-0.0)             | <0.001  |
| Home Care                                      | 1132 | 0.0 (0.0-0.0)         | 0.0 (0.0-0.0)                | 0.0 (0.0-0.0)                            | 0.0 (0.0-0.0)             | <0.001  |
| Other                                          | 909  | 0.0 (0.0-0.0)         | 0.0 (0.0-0.0)                | 0.0 (0.0-0.0)                            | 8.7 (0.0-29.2)            | <0.001  |
| Tests                                          | 1150 | 17.5 (0.0-58.3)       | 0.0 (0.0-3.5)                | 29.2 (14.6-58.3)                         | 42.0 (20.4-58.3)          | <0.001  |
| Food                                           | 832  | 5.8 (0.0-58.3)        | 2.9 (0.0-5.8)                | 14.6 (0.0-58.3)                          | 8.7 (0.0-29.2)            | <0.001  |
| Medicine                                       | 1170 | 58.3 (14.6-70.0)      | 70.0 (0.0-87.5)              | 35.0 (17.5-58.3)                         | 70.5 (37.9-116.6)         | <0.001  |
| Transport                                      | 1685 | 8.7 (2.9-17.5)        | 14.6 (5.8-29.2)              | 5.8 (0.0-11.7)                           | 11.7 (5.8-17.5)           | <0.001  |
| Total Post-Hospitalization Cost                | 925  | 87.5 (20.4-174.9)     | 17.5 (8.7-87.5)              | 87.5 (35.0-174.9)                        | 151.6 (98.5-291.5)        | <0.001  |

**eTable 3.** Detailed In-Hospital And Post-Hospitalization Expenditures (INT\$) of 2,114 ACS QUIK Respondents Who Completed Microeconomic Questionnaires, Overall and by Myocardial Infarction Type.

IQR=interquartile range, INT=international dollar.

| Expenditures                                   | N    | Overall<br>n=2,114    | NSTEMI<br>n=970      | STEMI<br>n=1144       | P-Value |
|------------------------------------------------|------|-----------------------|----------------------|-----------------------|---------|
| <b>Median (IQR) In-Hospital Costs</b>          |      |                       |                      |                       |         |
| Hospital Admission                             | 1319 | 7.0 (0.0-7.0)         | 7.0 (1.2-7.0)        | 7.0 (0.0-7.0)         | <.001   |
| Tests                                          | 1202 | 58.3 (43.7-174.9)     | 87.5 (58.3-204.1)    | 58.3 (37.9-116.6)     | <.001   |
| Emergency Room                                 | 1299 | 0.0 (0.0-11.7)        | 0.1 (0.0-29.2)       | 0.0 (0.0-8.7)         | <.001   |
| Food                                           | 934  | 58.3 (29.2-58.3)      | 58.3 (29.2-58.3)     | 58.3 (26.2-58.3)      | 0.39    |
| Treatment                                      | 1099 | 291.5 (58.3-4809.9)   | 233.2 (71.7-583.0)   | 524.7 (0.0-5830.2)    | <.001   |
| Ambulance                                      | 1048 | 0.0 (0.0-0.0)         | 0.0 (0.0-0.0)        | 0.0 (0.0-0.0)         | 0.51    |
| Surgery                                        | 1182 | 0.0 (0.0-0.0)         | 0.0 (0.0-0.0)        | 0.0 (0.0-0.0)         | <.001   |
| Other                                          | 931  | 0.0 (0.0-29.2)        | 0.0 (0.0-58.3)       | 0.0 (0.0-29.2)        | <.001   |
| Medicine                                       | 1224 | 116.6 (58.3-240.8)    | 174.9 (58.3-320.7)   | 116.6 (58.3-201.4)    | <.001   |
| Attendant                                      | 2114 | 58.3 (26.2-116.6)     | 70.0 (23.3-116.6)    | 58.3 (29.2-116.6)     | 0.52    |
| Travel                                         | 2114 | 14.3 (5.8-29.2)       | 11.7 (5.8-29.2)      | 14.6 (5.8-29.2)       | 0.30    |
| Total In-Hospital Cost                         | 917  | 1457.6 (583.0-7287.8) | 932.8 (524.7-2798.5) | 4955.7 (699.6-7287.8) | <.001   |
| <b>Median (IQR) Post-Hospitalization Costs</b> |      |                       |                      |                       |         |
| Doctor Fees                                    | 1297 | 7.0 (0.0-11.7)        | 7.0 (0.0-11.7)       | 7.0 (0.0-8.7)         | <.001   |
| Rehabilitation                                 | 1013 | 0.0 (0.0-0.0)         | 0.0 (0.0-0.0)        | 0.0 (0.0-0.0)         | 0.10    |
| Home Care                                      | 1132 | 0.0 (0.0-0.0)         | 0.0 (0.0-0.0)        | 0.0 (0.0-0.0)         | 0.05    |
| Other                                          | 909  | 0.0 (0.0-0.0)         | 0.0 (0.0-5.8)        | 0.0 (0.0-0.0)         | <.001   |
| Tests                                          | 1150 | 17.5 (0.0-58.3)       | 17.5 (2.3-46.6)      | 14.6 (0.0-58.3)       | 0.35    |
| Food                                           | 832  | 5.8 (0.0-58.3)        | 5.8 (0.0-29.2)       | 8.7 (0.0-58.3)        | 0.008   |
| Medicine                                       | 1170 | 58.3 (14.6-70.0)      | 52.5 (17.5-70.0)     | 58.3 (11.7-75.8)      | 0.53    |
| Transport                                      | 1685 | 8.7 (2.9-17.5)        | 8.7 (3.5-17.5)       | 8.7 (0.0-20.4)        | 0.99    |
| Total Post-Hospitalization Cost                | 925  | 87.5 (20.4-174.9)     | 107.5 (35.0-174.9)   | 87.5 (15.2-174.9)     | 0.24    |

**eFigure 1.** Flowchart of Participants Completing Microeconomic Survey During Steps Within the ACS QUIK Cluster Randomized Stepped Wedge Trial

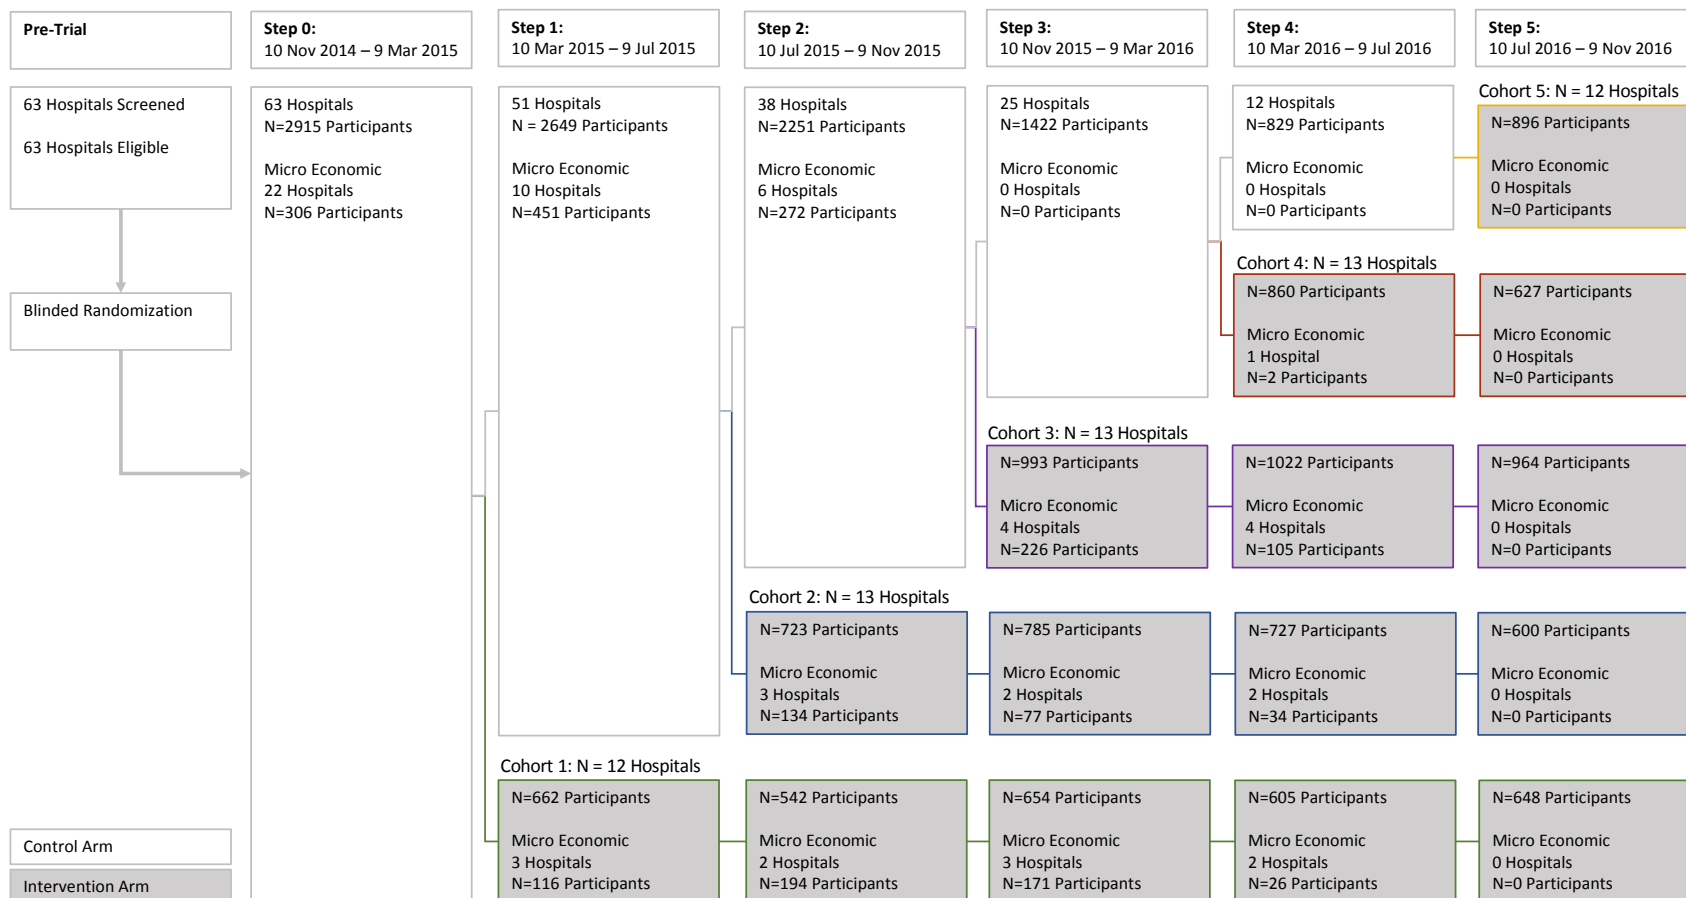

\*Randomization occurred at a single point in time prior to patient enrollment. Hospitals were blinded to their assigned cohort until 2 weeks prior to the time point at which their cohort moved from the control to intervention stage.

**eFigure 2.** Proportion of CVD Expenses Paid From Patient Reported Payment Sources by Insurance Status

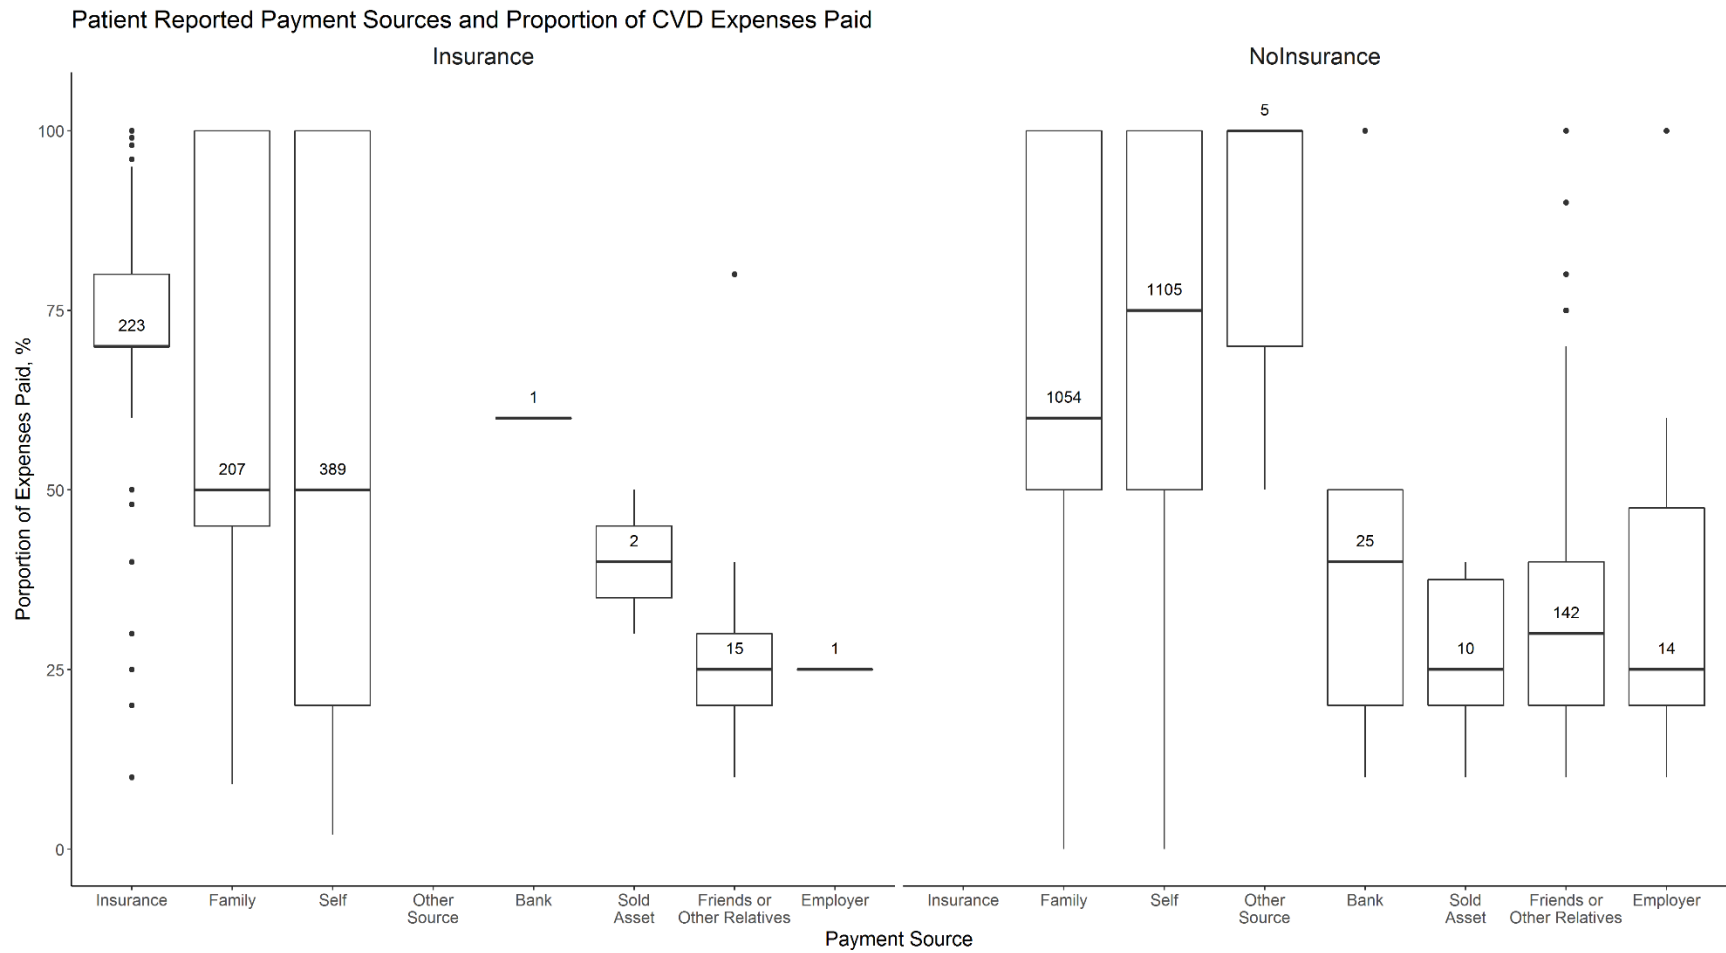

Supplement: jamanetwopen-2-e193831-s001.pdf [file jamanetwopen-2-e193831-s001.pdf]
